# Supplementary material for: Functionalization and metathesis polymerization induced self-assembly of an alternating copolymer into giant vesicles
Source: Royal Society of Chemistry journal article supplement (doi:10.1039/d1ra00835h), 2021-01-01
Supplement: d1ra00835h1.pdf [file d1ra00835h1.pdf]

# Functionalization and Metathesis Polymerization Induced Self-Assembly of Alternating Copolymer into Giant Vesicles

Wei Song\*, Jiamin Shen<sup>1</sup> and Xiang Li

<sup>\*</sup> *Department of Polymer and Composite Material, School of Materials Engineering, Yancheng Institute of Technology, Yancheng, 224051, China*

<sup>\*</sup>*Correspondence: sw121092@ycit.cn (W.S.); Tel.: +86-0515-8829-8872 (W.S.)*

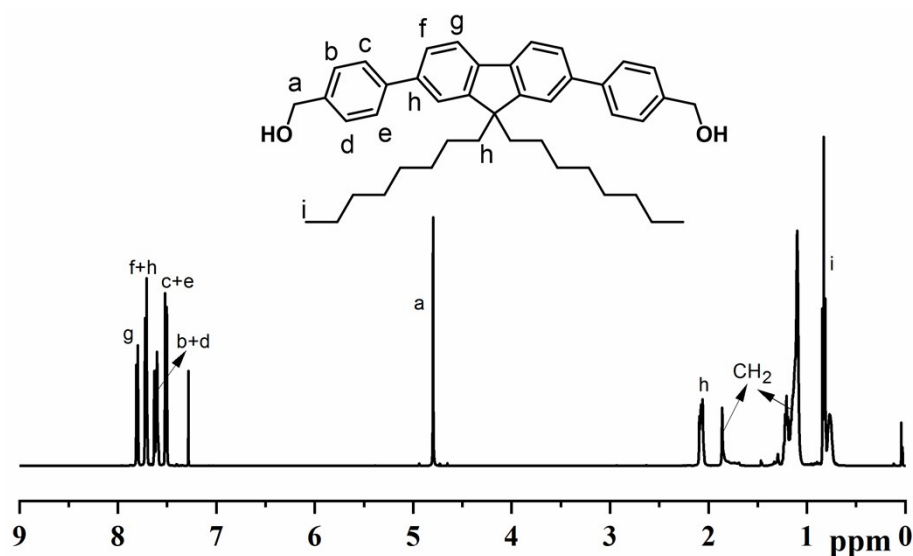

Fig. S1. <sup>1</sup>H NMR spectra for **2a** in CDCl<sub>3</sub>.

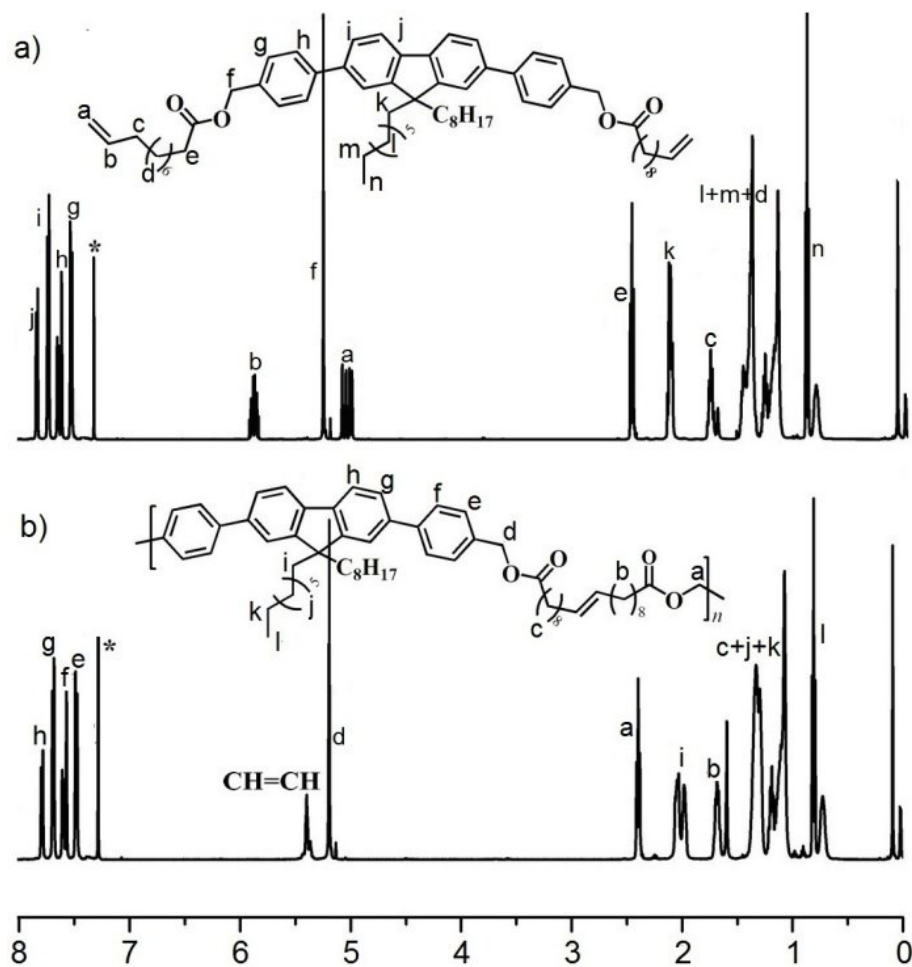

Fig. S2. <sup>1</sup>H NMR spectra for a) monomer **M2** and b) the corresponding polymer **P2** in CDCl<sub>3</sub>.

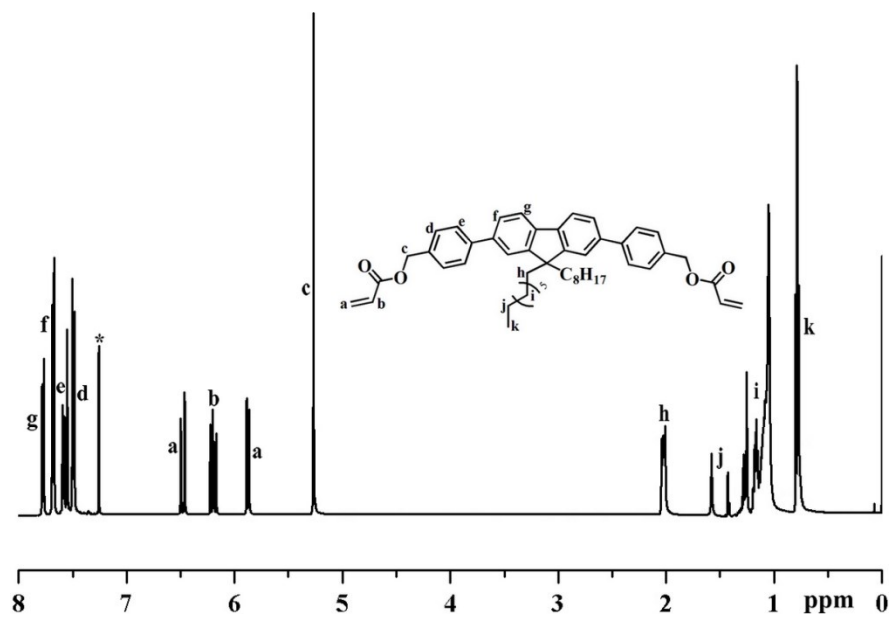

Fig.S3. <sup>1</sup>H NMR spectra for monomer **M3** in CDCl<sub>3</sub>.
